# Supplementary material for: Induced DNA double strand breaks by anti-cancer drugs occur at active transcription histone mark H3K36 tri-methylation
Source: Research Square preprint supplement (doi:10.21203/rs.3.rs-8168296/v1), 2025-12-10
Supplement: Supplementary file 1 [file 89a16444f125ef858af5deb1.xlsx]

## Sheet: VC-specificDSBs
chr	start	end	mid	RI/VC
chrVIII	562114	562642	529	C0
chrIII	14	413	400	C0
chrXIV	784038	784332	295	C0
chrXII	451509	452354	846	C0
chrXII	452422	452880	459	C0
chrXII	458481	461277	2797	C0
chrVIII	562193	562642	450	C0
chrIV	149113	149327	215	C0
chrIX	7018	7337	320	C0
chrX	6999	7291	293	C0
chrI	189222	189456	235	C0
chrVII	567820	568047	228	C0
chrX	416731	416967	237	C0
chrXIII	183455	183701	247	C0
chrIV	149117	149311	195	CC
chrXII	460035	460887	853	CC
chrIII	34	395	362	CC
chrIX	7015	7380	366	CC
chrX	7000	7353	354	CC
chrXIV	784039	784332	294	CC
chrI	189222	189435	214	CC
chrXII	460183	460813	631	CA
chrVII	567822	568054	233	CD
chrX	416728	416958	231	CD
chrXI	16190	16405	216	CD
chrXII	11108	11349	242	CD
chrXII	451556	451787	232	CD
chrXII	460185	460829	645	CD
chrXV	1090984	1091278	295	CD
chrXII	460148	460804	657	C0
chrIII	75	356	282	CD
chrIV	149115	149326	212	C0
chrVIII	556876	557065	190	CD
chrVIII	562194	562632	439	CD
chrXIV	784066	784319	254	CD
chrIX	7018	7384	367	CM
chrX	7001	7353	353	CM
chrVII	567872	568038	167	CM
chrXII	11037	11366	330	C0
chrXI	666613	666811	199	C0
chrVIII	556851	557130	280	C0

## Sheet: RIVC-commonDSBs
chr	start	end	mid	RI/VC
chrVIII	556856	557060	205	C0-MMS
chrVIII	562118	562633	516	C0-MMS
chrI	189226	189474	249	CA-AD
chrIX	7019	7400	382	CA-AD
chrIX	246054	246245	192	CA-AD
chrX	7003	7381	379	CA-AD
chrX	416742	416951	210	CA-AD
chrXI	16194	16372	179	CA-AD
chrIV	149118	149312	195	CD-DOX
chrIX	7016	7377	362	CD-DOX
chrX	7001	7366	366	CD-DOX
chrIV	149114	149323	210	CM-MTX
chrI	189231	189458	228	CM-MTX
chrIII	49	395	347	CM-MTX
chrXIII	183488	183691	204	CM-MTX
chrXIV	784054	784331	278	CM-MTX
chrXII	11136	11354	219	C0-MMS
chrIII	75	367	293	C0-MMS

## Sheet: RI-specificDSBs
	chr			chr	start	end	mid	RI/VC	Origin	Origin_status	FirstUPgeneCloserToDSB	gene-DSB_distance	geneToOri_HeadOn?	FirstUpGeneCloserToOrigin	gene-Ori_distance	geneToOri_HeadOn?	Concordant?
chrI	1	143249	145930	1	143249	145930	144590	CPT	ARS108	Unchk	YAL002W	-1031.5	Y	YAL002W	1575.5	Y	Y
chrI	1	162149	162697	1	162149	162697	162423	MTX	ARS109	Unchk	YAR008W	-3042.5	Y	YAR008W	636	Y	Y
chrI	1	189218	189532	1	189218	189532	189375	HU	ARS(1:197740)	Chk	YAR033W	-922	Y	YAR035W	6521.5	Y	N
chrI	1	189223	189443	1	189223	189443	189333	DOX	ARS(1:197740)	Chk	YAR035W	-1885.5	Y	YAR035W	6521.5	Y	Y
chrI	1	189229	189474	1	189229	189474	189352	AD	ARS(1:197740)	Chk	YAR033W	-898.5	Y	YAR035W	6521.5	Y	N
chrII	2	223074	223254	2	223074	223254	223164	MTX	ARS207.8	Unchk	YBL005W	-4226	N	YBL001C	449.5	N	N
chrII	2	237341	238137	2	237341	238137	237739	CPT	ARS208	Unchk	YBL001C	-427	N	YBL001C	449.5	N	Y
chrII	2	254036	254989	2	254036	254989	254512	CPT	ARS209	Unchk	YBR008C	-1125.5	N	YBR008C	1626	N	Y
chrII	2	255267	255981	2	255267	255981	255624	CPT	ARS209	Unchk	YBR011C	-1917.5	Y	YBR008C	1626	N	N
chrII	2	479160	481481	2	479160	481481	480320	CPT	ARS216	Unchk	YBR119W	496	Y	YBR119W	6960.5	Y	Y
chrIII	3	51	358	3	51	358	204.5	MTX	ARS302a	Chk	YCL076W	-1559	Y	YCL076W	8630	Y	Y
chrIV	4	149112	149319	4	149112	149319	149216	AD	ARS408	Chk	YDL173W	-580	Y	YDL171C	5567	N	N
chrIV	4	323968	324286	4	323968	324286	324127	CPT	ARS413	Unchk	YDL077C	-5581.5	Y	YDL072C	453	Y	N
chrIV	4	544677	544900	4	544677	544900	544788	HU	ARS418	Unchk	YDR043C	-1770	N	YDR044W	8210.5	Y	N
chrIV	4	555144	555626	4	555144	555626	555385	CPT	ARS418	Unchk	YDR049W	-1185	Y	YDR049W	1142.5	Y	Y
chrIV	4	647509	648191	4	647509	648191	647850	MTX	ARS421	Chk	YDR098C	-3248.5	Y	YDR098C	4618	Y	Y
chrIV	4	880380	880550	4	880380	880550	880465	MTX	ARS(4:879291)	Chk	YDR208W	-11076.5	Y	YDR216W	2055.5	Y	N
chrIV	4	988603	989199	4	988603	989199	988901	MTX	ARS430	Unchk	YDR263C	-5981	N	YDR263C	21891	N	Y
chrV	5	59093	60226	5	59093	60226	59659.5	CPT	ARS507	Unchk	YEL050C	-601	Y	YEL050C	861.5	Y	Y
chrV	5	65591	66710	5	65591	66710	66150.5	CPT	ARS507	Unchk	YEL047C	-59.5	Y	YEL047C	6692	Y	Y
chrV	5	100565	101919	5	100565	101919	101242	CPT	ARS508	Unchk	YEL027W	232	N	YEL029C	3229.5	Y	N
chrV	5	300976	304673	5	300976	304673	302824	CPT	ARS514.5	Chk	YER072W	-174	N	YER072W	1185.5	N	Y
chrV	5	305268	308406	5	305268	308406	306837	CPT	ARS514.5	Chk	YER074W-A	-1047	N	YER073W	2995	N	N
chrV	5	445175	446693	5	445175	446693	445934	MTX	ARS518	Unchk	YER137C	-4342	Y	YER137C	2538.5	Y	Y
chrVII	7	404862	405123	7	404862	405123	404992	HU	ARS717	Unchk	YGL051W	-950.5	N	YGL049C	12982.5	N	N
chrVII	7	404866	405120	7	404866	405120	404993	AD	ARS717	Unchk	YGL051W	-951	N	YGL048C	10537	N	N
chrVII	7	563895	564400	7	563895	564400	564148	MTX	ARS721	Chk	YGR038W	-3127.5	Y	YGR039W	278.5	N	N
chrVII	7	567822	568077	7	567822	568077	567950	AD	ARS721	Chk	YGR048W	-22423	N	YGR048W	14463.5	N	Y
chrVIII	8	556864	557208	8	556864	557208
chrVIII	8	556990	557267	8	556990	557267	557128	MMS	ARS(8:550740)	Chk	YHR218W	-1839.5	N	YHR215W	2059.5	N	N
chrVIII	8	562012	562642	8	562012	562642	562327	MTX	ARS(8:550740)	Chk	YHR218W	-3359	N	YHR218W	8228	N	Y
chrIX	9	7013	7389	9	7013	7389	7201	AD	ARS905	Chk	YIL161W	-32585.5	N	YIL161W	6070.5	N	Y
chrIX	9	7013	7418	9	7013	7418	7215.5	HU	ARS905	Chk	YIL177C	-3900.5	N	YIL173W	19752.5	Y	N
chrIX	9	246057	246258	9	246057	246258	246158	AD	ARS913.5	Unchk	YIL062C	-1930.5	N	YIL062C	1586	N	Y
chrX	10	6996	7402	10	6996	7402	7199	HU	ARS1004	Chk	YJL222W-A	-2366.5	Y	YJL222W-A	14344	Y	Y
chrX	10	6997	7368	10	6997	7368	7182.5	AD	ARS1004	Chk	YJL222W-B	-2232	Y	YJL222W-B	14495	Y	Y
chrX	10	7005	7361	10	7005	7361	7183	DOX	ARS1004	Chk	YJL223C	-1774	N	YJL223C	14952.5	N	Y
chrX	10	210919	211332	10	210919	211332	211126	CPT	ARS1008	Unchk	YJL111W	-2505.5	N	YJL105W	2681	Y	N
chrX	10	416732	416987	10	416732	416987	416860	HU	ARS1014	Unchk	YJL006C	-6679	Y	YJL006C	6527.5	Y	Y
chrX	10	416742	416949	10	416742	416949	416846	AD	ARS1014	Unchk	YJL010C	-1631.5	Y	YJL010C	1466	Y	Y
chrX	10	476036	476500	10	476036	476500	476268	MTX	ARS1017	Unchk	YJR023C	-6349.5	Y	YJR023C	10610	Y	Y
chrX	10	653318	653865	10	653318	653865	653592	CPT	ARS1020	Chk	YJR125C	-1673.5	Y	YJR125C	1076	Y	Y
chrXI	11	16190	16400	11	16190	16400	16295	AD	ARS(11:15810)	Chk	YKL219W	-1198.5	Y	YKL219W	713.5	Y	Y
chrXI	11	151889	152929	11	151889	152929	152409	CPT	ARS1106	Unchk	YKL160W	-1083.5	N	YKL160W	439	N	Y
chrXI	11	162557	163415	11	162557	163415	162986	CPT	ARS1106	Unchk	YKL153W	-873.5	N	YKL155C	7350.5	Y	N
chrXII	12	81	474	12	81	474	277.5	MTX	ARS1203	Chk	YLL066W-B	-5412.5	Y	YLL066W-B	5270	Y	Y
chrXII	12	5525	6152	12	5525	6152	5838.5	MMS	ARS1203	Chk	YLL066W-B	148.5	Y	YLL066W-B	46345	Y	Y
chrXII	12	5921	6185	12	5921	6185	6053	MTX	ARS1203	Chk	YLL066W-B	-363	Y	YLL064C	38771	N	N
chrXII	12	10972	11169	12	10972	11169	11070.5	MMS	ARS1203	Chk	YLL065W	-830.5	Y	YLL065W	40134	Y	Y
chrXII	12	10979	11402	12	10979	11402
chrXII	12	92755	95967	12	92755	95967	94361	CPT	ARS1206.5	Chk	YLL025W	-572	N	YLL025W	1520.5	N	Y
chrXII	12	229707	232853	12	229707	232853	231280	CPT	ARS1211	Unchk	YLR042C	1070.5	N	YLR042C	1091	N	Y
chrXII	12	412626	412847	12	412626	412847	412736	HU	ARS1215	Unchk	YLR135W	-1668.5	N	YLR135W	1622.5	N	Y
chrXII	12	451487	453555	12	451487	453555	452521	MTX	ARS1216	Chk	YLR154W-C	-10.5	N	YLR154W-C	1926	N	Y
chrXII	12	451522	451848	12	451522	451848	451685	MMS	ARS1216	Chk	YLR154W-C	-846.5	N	YLR154W-C	1926	N	Y
chrXII	12	451538	468777	12	451538	468777	460158	HU	ARS1216	Chk	YLR154W-C	7626	N	YLR154W-C	1926	N	Y
chrXII	12	451569	459602	12	451569	459602	455586	CPT	ARS1216	Chk	YLR154W-C	3054	N	YLR154W-C	1926	N	Y
chrXII	12	453870	462670	12	453870	462670	458270	MTX	ARS1216	Chk	YLR154W-E	2734.5	N	YLR154W-C	1926	N	N
chrXII	12	454257	460989	12	454257	460989	457623	MMS	ARS1216	Chk	YLR154W-B	3148	N	YLR154W-C	1926	N	N
chrXII	12	460822	468799	12	460822	468799	464810	CPT	ARS1216	Chk	YLR154C-G	2213	Y	YLR154W-F	5348.5	N	N
chrXII	12	463007	468846	12	463007	468846	465926	MTX	ARS1216	Chk	YLR154C-H	-2967	Y	YLR154C-G	11992	Y	N
chrXII	12	463445	464629	12	463445	464629	464037	MMS	ARS1216	Chk	YLR154C-G	-1439.5	Y	YLR154C-G	11992	Y	Y
chrXII	12	464810	468836	12	464810	468836	466823	MMS	ARS1216	Chk	YLR154C-H	-2070.5	Y	YLR154C-G	11992	Y	N
chrXII	12	477843	478088	12	477843	478088	477966	MTX	ARS1216	Chk	YLR157C-C	-4160	N	YLR157C	22908.5	Y	N
chrXII	12	489983	490372	12	489983	490372	490178	CPT	ARS1217	Unchk	YLR162W-A	-323.5	Y	YLR162W-A	22491.5	Y	Y
chrXII	12	490009	490394	12	490009	490394	490202	HU	ARS1217	Unchk	YLR162W	-449.5	Y	YLR166C	16254	N	N
chrXII	12	490016	490338	12	490016	490338	490177	MTX	ARS1217	Unchk	YLR162W	-425	Y	YLR168C	13066.5	N	N
chrXII	12	682553	682770	12	682553	682770	682662	HU	ARS1220.5	Unchk	YLR271W	-489.5	Y	YLR271W	4342.5	Y	Y
chrXII	12	731609	732056	12	731609	732056	731832	CPT	ARS1222	Unchk	YLR302C	-541.5	Y	YLR301W	640.5	N	N
chrXII	12	793579	793917	12	793579	793917	793748	CPT	ARS1226	Unchk	YLR332W	-2507	Y	YLR334C	2743.5	Y	N
chrXII	12	1071168	1071576	12	1071168	1071576	1071372	MTX	ARS1235	Chk	YLR467W	-3828	N	YLR464W	7331	N	N
chrXIII	13	137	571	13	137	571	354	MTX	ARS(13:9745)	Chk	YML132W	-7459.5	Y	YML132W	1931.5	Y	Y
chrXIII	13	183363	183696	13	183363	183696	183530	AD	ARS1308	Unchk	YML047C	-2983.5	N	YML047C	3369	N	Y
chrXIII	13	183363	183749	13	183363	183749	183556	HU	ARS1308	Unchk	YML048W	-4524.5	Y	YML048W	4883.5	Y	Y
chrXIII	13	184380	184672	13	184380	184672	184526	CPT	ARS1308	Unchk	YML047C	-3980	N	YML047C	3369	N	Y
chrXIII	13	186893	188100	13	186893	188100	187496	MTX	ARS1308	Unchk	YML042W	-6297.5	N	YML047C	3369	N	N
chrXIII	13	188441	189392	13	188441	189392	188916	MTX	ARS1308	Unchk	YML042W	-4877.5	N	YML047C	3369	N	N
chrXIII	13	199220	201151	13	199220	201151	200186	MTX	ARS1308	Unchk	YML041C	-4851.5	Y	YML041C	11419	Y	Y
chrXIII	13	634804	635631	13	634804	635631	635218	CPT	ARS1324	Chk	YMR187C	118	Y	YMR187C	739	Y	Y
chrXIV	14	88	476	14	88	476	282	MTX	ARS1405	Chk	YNL339C	-2952.5	N	YNL339C	7529	Y	Y
chrXIV	14	6226	6559	14	6226	6559	6392.5	MTX	ARS1405	Chk	YNL338W	-247.5	Y	YNL338W	21943	Y	Y
chrXIV	14	6312	6627	14	6312	6627	6469.5	MMS	ARS1405	Chk	YNL336W	-2433	Y	YNL336W	19680.5	Y	Y
chrXIV	14	573777	575263	14	573777	575263	574520	CPT	ARS1422	Unchk	YNL034W	-3125	N	YNL034W	10150	N	Y
chrXIV	14	784037	784331	14	784037	784331	784184	MTX	ARS1428.5	Chk	YNR073C	-8640	Y	YNR073C	10047.5	Y	Y
chrXV	15	111061	112646	15	111061	112646	111854	CPT	ARS1509	Unchk	YOL109W	-1387	Y	YOL109W	3497	Y	Y
chrXV	15	120228	122346	15	120228	122346	121287	MTX	ARS1509	Unchk	YOL102C	-5055	Y	YOL105C	1008.5	Y	N
chrXV	15	427548	427756	15	427548	427756	427652	CPT	ARS1513.5	Unchk	YOR052C	-653	N	YOR057W	4068.5	Y	N
chrXV	15	979599	980426	15	979599	980426	980012	CPT	ARS1529	Unchk	YOR344C	-2386	N	YOR344C	3945.5	N	Y
chrXV	15	1090738	1091290	15	1090738	1091290	1091014	MTX	ARS1529.5	Unchk	YOR394C-A	-6732.5	Y	YPL283C	9615	N	N
chrXVI	16	60659	61252	16	60659	61252	60955.5	MTX	ARS1605	Unchk	YPL256C	-4840	N	YPL256C	7365	N	Y
chrXVI	16	406132	408920	16	406132	408920	407526	CPT	ARS1619	Unchk	YPL078C	-848	N	YPL078C	9871.5	N	Y
chrXVI	16	806578	807297	16	806578	807297	806938	MTX	ARS1627	Unchk	YPR135W	-6316	Y	YPR139C	5670	N	N
chrXVI	16	847930	848297	16	847930	848297	848114	MTX	ARS1628	Unchk	YPR159W	-10546.5	N	YPR154W	7885.5	Y	N
chrXVI	16	848719	849569	16	848719	849569	849144	MTX	ARS1628	Unchk	YPR159W	-9516	N	YPR154W	7885.5	Y	N
